# Supplementary material for: Wet wipes in untreated wastewater are a source of litter pollution to the arctic marine environment – a case study on the loads of litter and microplastics in wastewater effluents in Greenland
Source: Royal Society of Chemistry journal article supplement (doi:10.1039/d4va00233d), 2024-09-20
Supplement: d4va00233d1.pdf [file d4va00233d1.pdf]

## Supplementary

Table S1: Summary of sampling scheme.

| Sample                | Town     | Date of sampling | Duration of sampling (start and end time) | Weekday/ weekend day | Field blank |
|-----------------------|----------|------------------|-------------------------------------------|----------------------|-------------|
| <b>Macro-plastics</b> | Nuuk     | 06/09/2022       | 08:50-12:00                               | Weekday              | N           |
|                       | Sisimiut | 30/08/2022       | 05:45-09:10                               | Weekday              | N           |
|                       |          | 16/09/2022       | 16:15-18:15                               | Weekday              | N           |
|                       |          | 23/11/2022       | 07:30-9:00                                | Weekday              | N           |
|                       |          | 23/11/2022       | 20:30-21:00                               | Weekday              | N           |
| <b>Meso-plastics</b>  | Nuuk     | 01/09/2022       | 16:00-18:25                               | Weekday              | N           |
|                       |          | 04/09/2022       | 17:45-20:10                               | Weekend day          | N           |
|                       |          | 06/09/2022       | 06:20-08:45                               | Weekday              | N           |
|                       | Sisimiut | 25/08/2022       | 18:30-21:00                               | Weekday              | N           |
|                       |          | 26/08/2022       | 05:45-08:10                               | Weekday              | N           |
|                       |          | 27/08/2022       | 13:20-15:45                               | Weekend day          | N           |
| <b>Microplastics</b>  | Sisimiut | 22/11-2022       | 11 am                                     | Weekday              | Y           |
|                       |          | 23/11-2022       | 7am                                       | Weekday              | Y           |

Table S2a. Number of microplastic fragments/foil/film particles in the blank samples (field blanks (n=2) and lab blanks (n=2)) as well as detection limits (DL) for the primary polymer types calculated as the mean value in the blank samples + 3 x standard deviation for the total content of microplastic fragments/foil/film particles per sample and per liter of wastewater.

| Polymer type*                                     | PE  | PP  | PES | PS | PVC | PC | PMMA | PA | PUR | ABS | Total | Mass (µg) |
|---------------------------------------------------|-----|-----|-----|----|-----|----|------|----|-----|-----|-------|-----------|
| Average number of MP per blank field sample (n=2) | 2   | 1   | 0.7 | 0  | 0   | 0  | 0    | 0  | 0   | 0   | 4.5   | 0.11      |
| Average number of MP per blank lab sample (n=2)   | 2   | 6   | 0   | 0  | 0.3 | 0  | 0    | 0  | 0   | 0   | 8.3   | 0.13      |
| Average number of MP per total blank sample (n=4) | 2.0 | 3.5 | 0.3 | 0  | 0.2 | 0  | 0    | 0  | 0   | 0   | 6.0   | 0.12      |
| DL for number of MP per blank sample              | 10  | 12  | 2   | 1  | 2   | 1  | 1    | 1  | 1   | 1   | 17    | 0.26      |
| Average number of MP per liter blank sample       | 3.0 | 5.3 | 0.5 | 0  | 0.3 | 0  | 0    | 0  | 0   | 0   | 11.2  | 0.18      |
| DL for number of MP per liter blank sample        | 15  | 18  | 3   | 2  | 3   | 2  | 2    | 2  | 2   | 2   | 26    | 0.39      |

\* Polymer type: PE (polyethylene), PP (polypropylene), PS (polystyrene), PES (polyester), PVC (polyvinyl chloride), PC (polycarbonate), PMMA (polymethyl methacrylate), PA (polyamide), PUR (polyurethane), ABS (akrylonitrile butadiene styrene)

Table S2b. Number of microplastic fibers in the blank samples (field blanks (n=2) and lab blanks (n=2)) as well as detection limits (DL) for coloured and white fibers calculated as the mean value in the blank samples + 3 x standard deviation for the total content of microplastics per sample of wastewater.

| <b>Polymer Colour</b>                             | <b>Coloured fibers</b> | <b>White fibers</b> | <b>Total fibers</b> |
|---------------------------------------------------|------------------------|---------------------|---------------------|
| Average number of MP per blank field sample (n=2) | 8.3                    | 77                  | 85.3                |
| Average number of MP per blank lab sample (n=2)   | 12                     | 60.5                | 72.5                |
| Average number of MP per blank sample (n=4)       | 5                      | 35                  |                     |
| DL for number of MP per blank sample              | 16                     | 77                  |                     |
| Average number of MP per liter blank sample       | 7.6                    | 53.0                |                     |
| DL for number of MP per liter blank sample        | 24.2                   | 116,7               |                     |

Table S3: Summary of a wet wipe survey in shops in Sisimiut. ‘%’ indicates that the product declaration lacks this information.

| Brand                             | Trade name                              | Application purpose<br>(baby, sanitary, cleaning) | Marked as<br>biodegradable<br>(B) and/or<br>flushable (F) | Declaration<br>(%PET, %viscose, bamboo etc) | FTIR-analysis   |                   |
|-----------------------------------|-----------------------------------------|---------------------------------------------------|-----------------------------------------------------------|---------------------------------------------|-----------------|-------------------|
|                                   |                                         |                                                   |                                                           |                                             | Primary polymer | Secondary polymer |
| <i>Personal care</i>              |                                         |                                                   |                                                           |                                             |                 |                   |
| Änglamark                         | Bamboo wipes                            | Baby                                              |                                                           | Bamboo                                      | Viscose         |                   |
| Änglamark                         | Dermacare makeup wipe                   | Sanitary, facial                                  |                                                           | Bamboo                                      | Viscose         |                   |
| Änglamark                         | Make up cleansing wipe                  | Sanitary face                                     |                                                           | %                                           | PES (PET)       |                   |
| Änglamark                         | Wipes                                   | Baby                                              |                                                           | 60% PES, 40% viscose                        | PES (PET)       |                   |
| Cherish                           | Facial cleansing wipes 4 in 1           | Sanitary, facial                                  |                                                           | %                                           | PES (PET)       |                   |
| Everyday eye depend               | Make up removal wipe                    | Sanitary, face                                    |                                                           | 100% viscose                                | Viscose         | ?                 |
| Grøn balance                      | Make-up 3i1 renseservietter             | Sanitary, facial                                  |                                                           | 70% viscose / 30% polyester                 | PES (PET)       |                   |
| Grøn balance                      | Vådservietter                           | Baby                                              |                                                           | 40% viscose / 60% polyester                 | PES (PET)       |                   |
| Huggies                           | Natural                                 | Baby                                              | B                                                         | Natural fibers                              | Cellulose       |                   |
| Kleenex                           | Water fresh wipes                       | Sanitary, hand & facial                           |                                                           | %                                           | PP              | Cellulose         |
| Libero                            | Hand & face wipes                       | Sanitary, hand & facial                           |                                                           | %                                           | Cellulose       |                   |
| Libero                            | Wet wipes                               | Baby                                              |                                                           | 100% viscose                                | Viscose         |                   |
| Libresse                          | Dailies V-gentle                        | Sanitary, intimate areas                          |                                                           | %                                           | PES (PET)       |                   |
| Lotus                             | Sensitive                               | Sanitary (toilet paper)                           | B/F                                                       | Natural fibers                              | Cellulose       |                   |
| Nivea                             | Cleansing wipes                         | Sanitary, facial & eyes                           |                                                           | Natural fibers                              | ?               |                   |
| Vivag                             | Intimservietter                         | Sanitary, intimate areas                          |                                                           | %                                           | Viscose         |                   |
| Vivag                             | Intimservietter specielt til intimzonen | Sanitary, intimate areas                          |                                                           | %                                           | Viscose         |                   |
| <i>Domestic/cleaning purposes</i> |                                         |                                                   |                                                           |                                             |                 |                   |
| Ajax                              | Multi action                            | Cleaning glass wipes                              | B                                                         | Natural fibers                              | Viscose         |                   |
| Ajax                              | Universal                               | Cleaning universal                                | B                                                         | Natural fibers                              | Viscose         |                   |
| Ajax                              | Universal antibacterial                 | Cleaning universal                                |                                                           |                                             | Viscose         |                   |

|          |                           |                    |                     |           |
|----------|---------------------------|--------------------|---------------------|-----------|
| Coop     | Cleaning wipe lemon       | Cleaning universal | Viscose / Polyester | PES (PET) |
| Coop     | Cleansing wipes- bathroom | Cleaning bathroom  | Viscose / Polyester | PES (PET) |
| Coop     | Stad-servetter            | Cleaning bathroom  | Viscose / Polyester | PES (PET) |
| Domestos | Absolute Hygiene          | Cleaning universal | Natural fibers      | Viscose   |
| Klorin   | Klorin wipes              | Cleaning universal | %                   | PES (PET) |
| Lysol    | Multipurpose wipes        | Cleaning universal | %                   | Viscose   |

---
